# Relationship of Prospective GHb to Glycated Serum Proteins in Incident Diabetic Retinopathy

Implications of the glycation gap for mechanism of risk prediction

ROBERT M. COHEN, MD<sup>1,2</sup>  
TAMARA J. LECAIRE, MS<sup>3</sup>  
CHRISTOPHER J. LINDELL, PHD<sup>4</sup>

ERIC P. SMITH, MD<sup>1</sup>  
DONN J. D'ALESSIO, MD<sup>3</sup>

When estimating long-term glyce-  
mic control, A1C is considered  
the gold standard (1–3), but pa-  
tients with seemingly equivalent A1C dif-  
fer in their risk for microvascular  
complications (4,5). Recently, the “glyca-  
tion gap,” defined as the difference be-  
tween the measured A1C and that which  
would be predicted from another mea-  
sure of glycemic control, fructosamine,  
has been proposed as a means of identify-  
ing sources of variance in the apparent  
risk (6). Because hemoglobin is an intra-  
cellular protein and fructosamine reflects  
extracellular proteins, the glycation gap  
could result from differences between the  
ambient glucose concentrations or rates  
of glycation in the intracellular and extra-  
cellular compartments or interindividual  
differences in the turnover/metabolism of  
underlying proteins (6). In this study, we  
sought to determine whether there are  
differences in the relationship of GHb to  
fructosamine in diabetic subjects who do  
or do not develop retinopathy.

## RESEARCH DESIGN AND METHODS

The present study was  
completed in collaboration with the Wis-  
consin Diabetes Registry Study (WDRS),  
an incident type 1 diabetes cohort fol-  
lowed for complications over 4–14 years’

duration. The WDRS has been described  
previously (7). New fructosamine testing  
was completed in 86 subjects who were  
identified among 290 with fundus photo-  
graphs at 9 years. Patients with retinopa-  
thy ( $n = 13$ ), patients with missing  
photographs indicating no retinopathy  
( $n = 38$ ) at 4 years or missing GHb or  
random glucose at 4 and/or 9 years ( $n =$   
118), and patients having insufficient  
plasma for testing fructosamine at the  
4-year exam ( $n = 35$ ) were excluded. Of  
the 86 eligible patients, 2 with fruc-  
tosamine concentrations  $>1,000 \mu\text{mol/l}$   
were omitted. Of the 84 patients in-  
cluded, 42 had retinopathy at 9 years.

Retinal status was assessed using a se-  
verity scale developed for the Wisconsin  
Epidemiologic Study of Diabetic Retinopa-  
thy (8,9). Total GHb was determined  
using microcolumn affinity chroma-  
tography within 7 days of sample collec-  
tion (Isolab Glycaphin; Isolab, Akron, OH;  
intra-assay coefficient of variation [CV]  
1.1%) (10). Fructosamine assays used a  
Roche kit Hitachi autoanalyzer; determi-  
nations were performed by single assay of  
samples stored at  $-80^\circ\text{C}$  for intervals of  
9–14 years (intra-assay CV 1.2%). The  
mean CV of a panel of seven control sam-  
ples measured over a 35-month period  
was 4% (range 2–6).

The glycation gap was computed as  
previously described (6). A bootstrap  
technique was used to derive the param-  
eter estimates that would be obtained  
from an independent reference sample  
drawn from the same population. The  
Nagelkerke  $R^2$  was used to determine the  
relative contribution of predictor vari-  
ables to the model (11).

**RESULTS** — The groups did not differ  
in age, sex, race, or duration of diabetes  
(Table 1). GHb, fructosamine, and ran-  
dom glucose measured at the 4-year exam  
were significantly higher in those who  
subsequently developed retinopathy than  
in those who did not; the difference in  
GHb has been previously reported (7).  
Five subjects who developed retinopathy  
and two who did not met criteria for mi-  
croalbuminuria at 4 years ( $P = 0.23$ ), but  
mean urinary albumin excretion was nor-  
mal in both groups (data not shown).  
There is a significant difference in the gly-  
cation gap between those with and with-  
out subsequent retinopathy; the mean  
glycation gap is positive in those with re-  
tinopathy but negative in those without.  
Stated differently, the two groups were  
not symmetrically distributed about the  
regression line of GHb on fructosamine  
(supplemental Fig. 1, available in an on-  
line appendix at <http://dx.doi.org/10.2337/dc07-1465>), as would be  
predicted if glycemic control were the  
sole mediator of risk prediction by either  
GHb or fructosamine. Altogether, 21 of  
the affected and 13 of the unaffected pa-  
tients were above the line, while 21 of the  
affected and 29 of the unaffected patients  
were below the line (suppl. Fig. 1;  $\chi^2 P =$   
0.014).

The  $R^2$  for the regression of GHb on  
fructosamine was 0.33, suggesting that  
the glycation gap accounted for 67% of  
the variance in GHb (suppl. Fig. 1). Mod-  
els predicting retinopathy were based on  
the notion that GHb is an independent  
predictor of retinopathy that should  
equally contribute to predictive accuracy to a model  
containing both glycation gap and fruc-

From the <sup>1</sup>Division of Endocrinology, Metabolism and Diabetes, University of Cincinnati Medical Center, Cincinnati, Ohio; the <sup>2</sup>General Clinical Research Center, University of Cincinnati Medical Center, Cincinnati, Ohio; the <sup>3</sup>Department of Population Health Sciences, University of Wisconsin, Madison, Wisconsin; and the <sup>4</sup>Department of Emergency Medicine, University of Cincinnati Medical Center, Cincinnati, Ohio.

Address correspondence and reprint requests to Robert M. Cohen, MD, University of Cincinnati, P.O. Box 670547, Cincinnati, OH 45267-0547. E-mail: robert.cohen@uc.edu.

Received for publication 29 July 2007 and accepted in revised form 25 September 2007.

Published ahead of print at <http://care.diabetesjournals.org> on 27 September 2007. DOI: 10.2337/dc07-1465.

Additional information for this article can be found in an online appendix at <http://dx.doi.org/10.2337/dc07-1465>.

A table elsewhere in this issue shows conventional and Système International (SI) units and conversion factors for many substances.

© 2008 by the American Diabetes Association.

The costs of publication of this article were defrayed in part by the payment of page charges. This article must therefore be hereby marked “advertisement” in accordance with 18 U.S.C. Section 1734 solely to indicate this fact.

Table 1—Mean  $\pm$  SD or frequency (%) for pertinent 4-year exam data with significance of the differences and logistic regression analysis

|                                 | No retinopathy<br>(n = 42) | Retinopathy<br>(n = 42) | OR (95% CI)                                | R <sup>2</sup> | P              |
|---------------------------------|----------------------------|-------------------------|--------------------------------------------|----------------|----------------|
| Age (years)                     | 13.7 $\pm$ 7.8             | 15.3 $\pm$ 6.4          |                                            |                | 0.33           |
| Male                            | 17 (40.5)                  | 25 (59.5)               |                                            |                | 0.126          |
| Female                          | 25 (59.5)                  | 17 (40.5)               |                                            |                |                |
| Nonwhite                        | 0 (0)                      | 2 (4.8)                 |                                            |                | 0.494          |
| White                           | 42 (100)                   | 40 (95.2)               |                                            |                |                |
| UAE (mg/min)                    | 6.5 $\pm$ 0.4              | 14.1 $\pm$ 25.2         |                                            |                | 0.037          |
| Duration of diabetes (years)    | 3.4 $\pm$ 0.3              | 3.4 $\pm$ 0.3           |                                            |                | 0.625          |
| Glucose (mg/dl)                 | 195 $\pm$ 100              | 236 $\pm$ 101           |                                            |                | 0.061          |
| GHb (%)                         | 9.9 $\pm$ 2.1              | 12.1 $\pm$ 3.2          | 1.435 (1.150–1.791)                        | 0.214          | 0.001          |
| Fructosamine ( $\mu$ mol/l)     | 471 $\pm$ 137              | 565 $\pm$ 136           | 1.005 (1.002–1.009)                        | 0.144          | 0.004          |
| Glycation gap (%)               | −0.6 $\pm$ 1.8             | 0.6 $\pm$ 2.8           | 1.252 (1.025–1.528)                        | 0.083          | 0.028          |
| Fructosamine +<br>Glycation gap |                            |                         | 1.006 (1.002–1.010)<br>1.341 (1.055–1.703) | 0.238          | 0.002<br>0.016 |

UAE, urinary albumin excretion.

tosamine (i.e., the two components of GHb). Indeed, the accuracy of predictions for GHb was indistinguishable from the model combining fructosamine and glycation gap (C-statistic [a measure of the accuracy of predictions] for GHb alone: 0.726 [95% CI 0.618–0.835]; C-statistic for fructosamine + glycation gap: 0.747 [0.643–0.851]). However, the ratio of the Nagelkerke R<sup>2</sup> for the model containing glycation gap only to that containing both fructosamine and glycation gap suggests that the glycation gap accounts for 39% of the ability of GHb to predict retinopathy (Table 1).

**CONCLUSIONS**— The probability of developing retinopathy increased with increasing GHb and with another measure of glycemic control, fructosamine. There was insufficient microalbuminuria at 4 years to account for any difference in serum fructosamine between the groups (12). Fructosamine contributed about three-fifths to the predictive power of GHb, while the glycation gap contributed about two-fifths, suggesting that in this sample a substantial portion of the ability of GHb to predict diabetic retinopathy is due to properties it does not share in common with an alternative measure of glycemic control.

This attribute of the glycation gap representing a fraction of the variance in GHb independent of glycemic control (6) and its heritability (13,14) support the notion that the ability of GHb to predict diabetes complications may not reside solely in its ability to reflect average glycemic control. Though it is possible that

interindividual differences in protein turnover would contribute, it is more likely that either the glucose to which the proteins are exposed or the rate of glycation/deglycation (15) accounts for the difference in glycation gap between affected and unaffected individuals. Aside from intracellular concentration differences, largely determined by the facilitative glucose transporter GLUT1 (16), there could be factors, including genetic ones, inside the cell affecting the rate of either nonenzymatic glycation or enzymatic deglycation (17,18). Previous observations that GHb but not fructosamine is in part genetically determined (13) support this possibility.

It is important to stress that the glycation gap, similar to the “hemoglobin glycation index (HGI)” (19), is not independent of GHb (20,21); since the glycation gap is computed as the difference between a measured and a predicted A1C (or in this case GHb), independence is impossible. However, the glycation gap is not dependent on glycemic control, as indicated by the lack of correlation with fructosamine. Thus, the value of either the glycation gap (6) or the HGI (22) is that they represent a means of estimating the sources of variability in A1C that are shared in common with another measure of glycemic control and those that are unshared and therefore potentially due to other mechanisms (23,24). A1C is not synonymous with glycemic control, and it may be that some of the factors altering A1C apart from glycemic control also alter risk of diabetes complications, which

is what is captured in the risk prediction of glycation gap.

**Acknowledgments**— This project was supported by National Institutes of Health Grants R01 DK63088, M01 RR08084, and R01 DK36904 and a grant from the Juvenile Diabetes Research Foundation.

We acknowledge helpful discussions with Dr. Mari Palta.

## References

1. Nathan DM, Cleary PA, Backlund JY, Genuth SM, Lachin JM, Orchard TJ, Raskin P, Zinman B: Intensive diabetes treatment and cardiovascular disease in patients with type 1 diabetes. *N Engl J Med* 353: 2643–2653, 2005
2. UKPDS Study Group: Intensive blood-glucose control with sulphonylureas or insulin compared with conventional treatment and risk of complications in patients with type 2 diabetes (UKPDS 33). *Lancet* 352:837–853, 1998
3. The effect of intensive treatment of diabetes on the development and progression of long-term complications in insulin-dependent diabetes: Diabetes Control and Complications Trial Research Group. *N Engl J Med* 329:977–986, 1993
4. Nathan DM, Singer DE, Hurxthal K, Goodson JD: The clinical information value of the glycosylated hemoglobin assay. *N Engl J Med* 310:341–346, 1984
5. Kilpatrick ES: HbA1c measurement. *J Clin Pathol* 57:344–345, 2004
6. Cohen RM, Holmes YR, Chenier TC, Joiner CH: Discordance between HbA<sub>1c</sub> and fructosamine: evidence for a glycosylation gap and its relation to diabetic nephropathy. *Diabetes Care* 26:163–167, 2003

7. LeCaire TJ, Palta M, Zhang H, Allen C, Klein R, D'Alessio D: Lower-than-expected prevalence and severity of retinopathy in an incident cohort followed during the first 4–14 years of type 1 diabetes: the Wisconsin Diabetes Registry Study. *Am J Epidemiol* 164:143–150, 2006
8. Klein R, Palta M, Allen C, Shen G, Han DP, D'Alessio DJ: Incidence of retinopathy and associated risk factors from time of diagnosis of insulin-dependent diabetes. *Arch Ophthalmol* 115:351–356, 1997
9. Klein R, Klein BE, Moss SE, Davis MD, DeMets DL: The Wisconsin Epidemiologic Study of Diabetic Retinopathy. III. Prevalence and risk of diabetic retinopathy when age at diagnosis is 30 or more years. *Arch Ophthalmol* 102:527–532, 1984
10. Palta M, Shen G, Allen C, Klein R, D'Alessio D: Longitudinal patterns of glycemic control and diabetes care from diagnosis in a population-based cohort with type 1 diabetes: the Wisconsin Diabetes Registry. *Am J Epidemiol* 144:954–961, 1996
11. Nagelkerke NJ: A note on a general definition of the coefficient of determination. *Biometrika* 78:691–692, 2007
12. Parving HH, Rossing N, Sander E: Increased metabolic turnover rate and transcapillary escape rate of albumin in long-term juvenile diabetics. *Scand J Clin Lab Invest* 35:59–66, 1975
13. Cohen RM, Snieder H, Lindsell CJ, Beyan H, Hawa MI, Blinko S, Edwards R, Spector TD, Leslie RD: Evidence for independent heritability of the glycation gap (glycosylation gap) fraction of HbA<sub>1c</sub> in nondiabetic twins. *Diabetes Care* 29:1739–1743, 2006
14. Snieder H, Sawtell PA, Ross L, Walker J, Spector TD, Leslie RD: HbA<sub>1c</sub> levels are genetically determined even in type 1 diabetes: evidence from healthy and diabetic twins. *Diabetes* 50:2858–2863, 2001
15. Delpierre G, Collard F, Fortpied J, Van SE: Fructosamine 3-kinase is involved in an intracellular deglycation pathway in human erythrocytes. *Biochem J* 365:801–808, 2002
16. Wood IS, Trayhurn P: Glucose transporters (GLUT and SGLT): expanded families of sugar transport proteins. *Br J Nutr* 89:3–9, 2003
17. Gould BJ, Davie SJ, Yudkin JS: Investigation of the mechanism underlying the variability of glycated haemoglobin in non-diabetic subjects not related to glycaemia. *Clin Chim Acta* 260:49–64, 1997
18. Jeffcoate SL: Diabetes control and complications: the role of glycated haemoglobin, 25 years on. *Diabet Med* 21:657–665, 2004
19. Chalew SA, McCarter RJ, Thomas J, Thomson JL, Hempe JM: A comparison of the glycosylation gap and hemoglobin glycation index in patients with diabetes. *J Diabetes Complications* 19:218–222, 2005
20. Genuth S, Lachin JM, Nathan DM: Biological variation in HbA<sub>1c</sub> predicts risk of retinopathy and nephropathy in type 1 diabetes: response to McCarter et al. (Letter). *Diabetes Care* 28:233–235, 2005
21. Lachin JM, Genuth S, Nathan DM, Rutledge BN: The hemoglobin glycation index is not an independent predictor of the risk of microvascular complications in the Diabetes Control and Complications Trial. *Diabetes* 56:1913–1921, 2007
22. Hempe JM, Gomez R, McCarter RJ Jr., Chalew SA: High and low hemoglobin glycation phenotypes in type 1 diabetes: a challenge for interpretation of glycemic control. *J Diabetes Complications* 16:313–320, 2002
23. Virtue MA, Furne JK, Nuttall FQ, Levitt MD: Relationship between GHb concentration and erythrocyte survival determined from breath carbon monoxide concentration. *Diabetes Care* 27:931–935, 2004
24. Connor JR, Beisswenger PJ, Szwergold BS: Some clues as to regulation, expression, function and distribution of fructosamine-3-kinase and fructosamine-3-kinase-related protein. *Ann NY Acad Sci* 1043:824–836, 2005
